# Supplementary material for: The multivariate detection limit for Mycoplasma pneumoniae as determined by nanorod array-surface enhanced Raman spectroscopy and comparison with limit of detection by qPCR
Source: Royal Society of Chemistry journal article supplement (doi:10.1039/c4an01141d), 2014-01-01
Supplement: c4an01141d1.pdf [file c4an01141d1.pdf]

Supplementary information for the manuscript:

**The multivariate detection limit for *Mycoplasma pneumoniae* as determined by Nanorod Array-Surface Enhanced Raman Spectroscopy and comparison with limit of detection by qPCR**

Kelley C. Henderson<sup>a</sup>  
Edward S. Sheppard<sup>a</sup>  
Omar E. Rivera-Betancourt<sup>b</sup>  
Joo-Young Choi<sup>b</sup>  
Richard A. Dluhy<sup>b</sup>  
Kathleen A. Thurman<sup>c</sup>  
Jonas M. Winchell<sup>c</sup>  
Duncan C. Krause<sup>a</sup>

<sup>a</sup>*Department of Microbiology, University of Georgia, Athens, GA,*

<sup>b</sup>*Department of Chemistry, University of Georgia, Athens, GA*

<sup>c</sup>*Pneumonia Response and Surveillance Laboratory, Centers for Disease Control and Prevention, Atlanta, GA*

Please direct all questions and correspondence to:

Duncan C. Krause  
dkrause@uga.edu  
(1)-706-542-2671

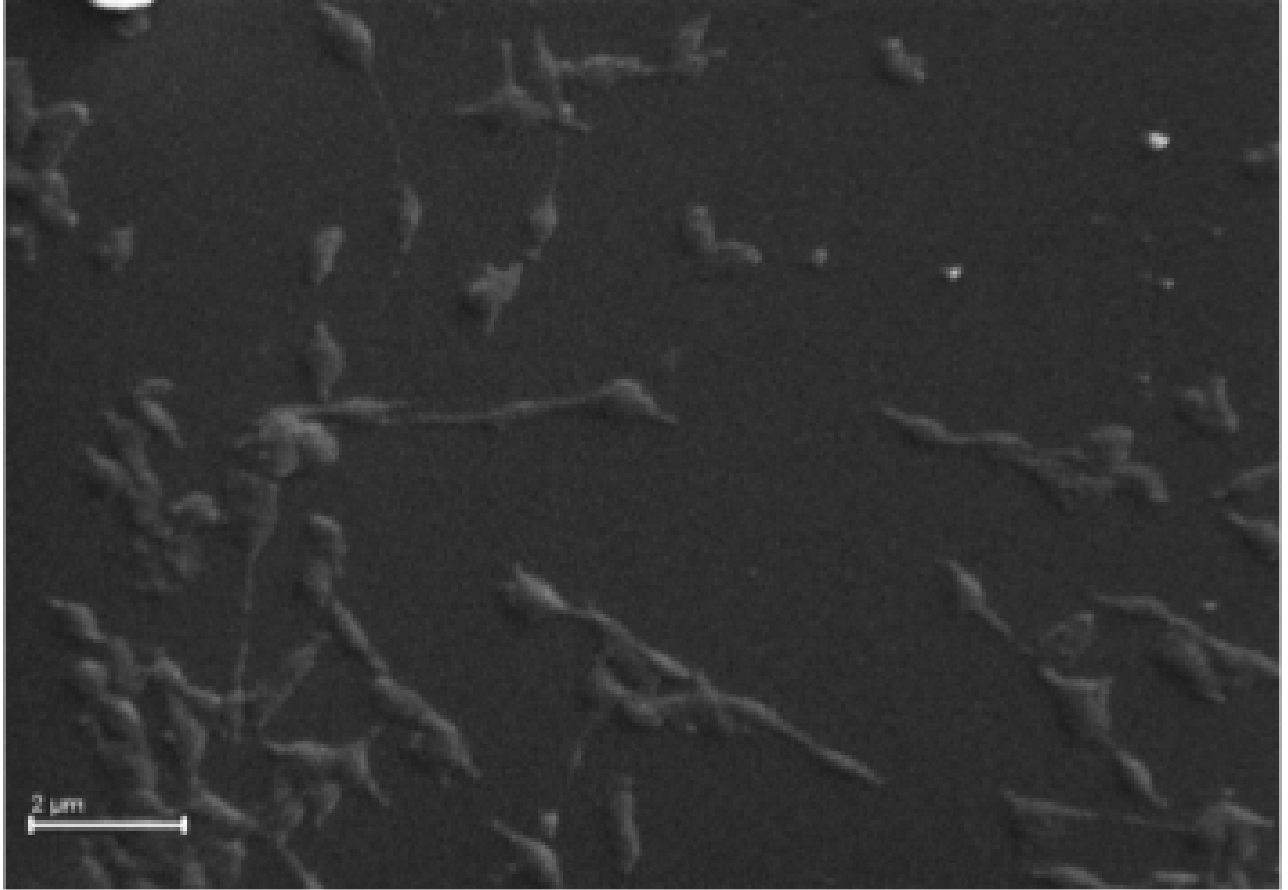

**Supplementary Fig. 1.** SEM image of intact *M. pneumoniae* cells grown on and attached to glass coverslips.

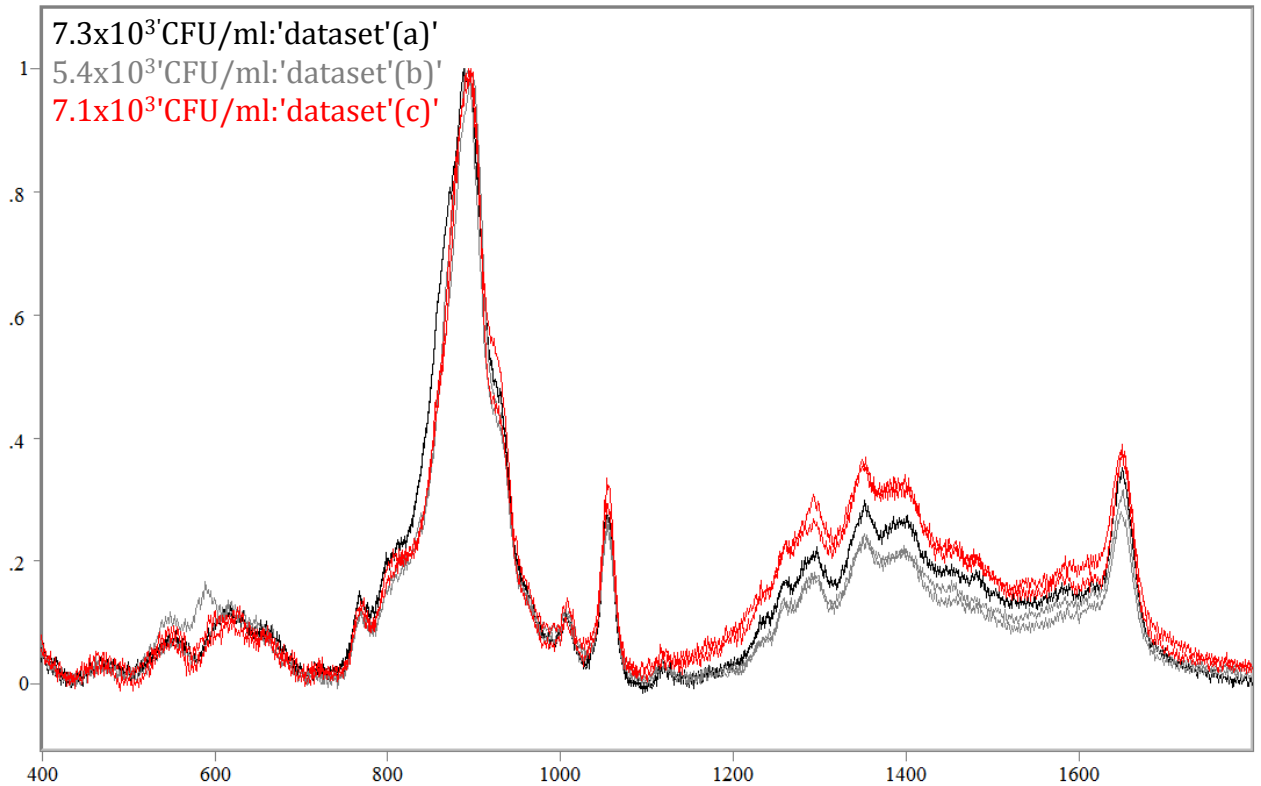

**Supplementary Fig. 2.** Baseline-corrected and normalized SERS spectra of intact-cell *M. pneumoniae* at the  $10^3$  CFU/ml dilutions from the three independent substrates. Two spectra are shown from each dataset representing spectra from duplicate wells of the  $10^3$  CFU/ml dilutions. Spectra from dataset (a) are shown in black, spectra from dataset (b) in dark gray, and spectra from dataset (c) in red.

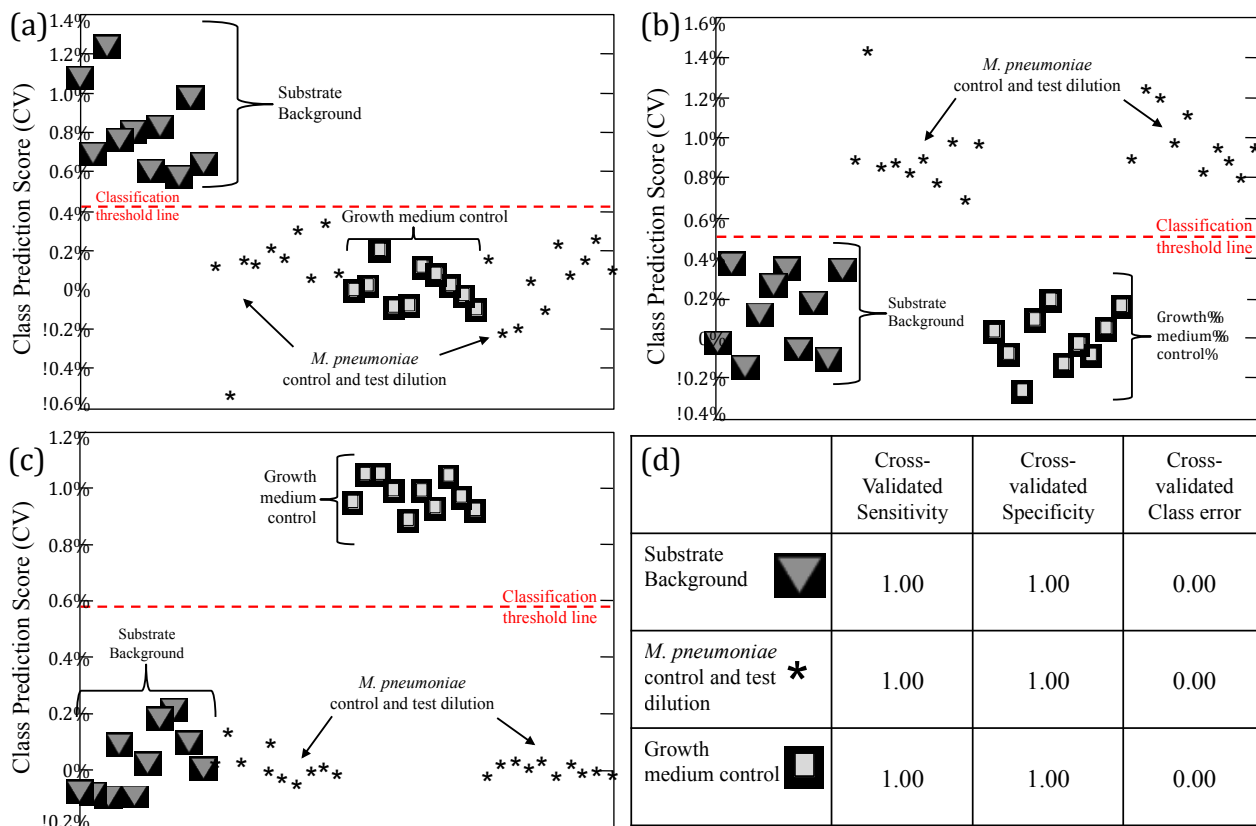

**Supplementary Fig. 3.** Example of PLS-DA modeling scheme used to determine NA-SERS sensitivities and specificities for intact-cell *M. pneumoniae* samples and to generate the statistics given in Supplementary Tables 4-6. Each individual shape represents a single pre-processed NA-SERS spectrum. Each panel represents a cross-validated class prediction score for (a) class 1, substrate background spectra; (b) class 2, *M. pneumoniae* control and test dilution spectra; and (c) class 3, growth medium control spectra. For all panels, substrate background spectra are represented by upside-down dark-gray triangles, *M. pneumoniae* control and test dilution spectra by black asterisks, and growth medium control spectra by light gray squares. The red-dotted line indicates the classification threshold line for positive class prediction. Cross-validated statistics for the model (d) were obtained using Venetian blinds with 6 data splits and represent the prediction performance of the PLS-DA plots shown in a-c.

**Supplementary Table 1.** Ct values for qPCR dataset (a).

| Dilution (cells/ml) | Rep 1 | Rep 2 | Rep 3 |
|---------------------|-------|-------|-------|
| $2.3 \times 10^7$   | 24.04 | 24.20 | 24.24 |
| $2.3 \times 10^6$   | 26.30 | 26.52 | 26.60 |
| $2.3 \times 10^5$   | 29.32 | 29.26 | 29.49 |
| $2.3 \times 10^4$   | 32.23 | 32.43 | 32.61 |
| $2.3 \times 10^3$   | 36.50 | 35.16 | 37.09 |
| $2.3 \times 10^2$   | -     | -     | -     |
| $2.3 \times 10^1$   | -     | -     | -     |
| $2.3 \times 10^0$   | -     | -     | -     |

- Indicates detectable amplification was not observed for this replicate

---

**Supplementary Table 2.** Ct values for qPCR dataset (b).

| Dilution (cells/ml) | Rep 1 | Rep 2 | Rep 3 |
|---------------------|-------|-------|-------|
| $2.8 \times 10^7$   | 23.58 | 23.38 | 23.50 |
| $2.8 \times 10^6$   | 28.00 | 26.11 | 26.71 |
| $2.8 \times 10^5$   | 30.16 | 30.06 | 29.86 |
| $2.8 \times 10^4$   | 34.57 | 34.14 | 33.30 |
| $2.8 \times 10^3$   | -     | -     | 39.26 |
| $2.8 \times 10^2$   | -     | -     | -     |
| $2.8 \times 10^1$   | -     | -     | -     |
| $2.8 \times 10^0$   | -     | -     | -     |

- Indicates detectable amplification was not observed for this replicate

---

**Supplementary Table 3.** Ct values for qPCR dataset (c).

| Dilution (cells/ml) | Rep 1 | Rep 2 | Rep 3 |
|---------------------|-------|-------|-------|
| $2.5 \times 10^7$   | 23.58 | 23.49 | 23.53 |
| $2.5 \times 10^6$   | 26.76 | 26.84 | 26.71 |
| $2.5 \times 10^5$   | 29.98 | 29.85 | 30.20 |
| $2.5 \times 10^4$   | 33.27 | 32.65 | 33.03 |
| $2.5 \times 10^3$   | 35.6  | -     | 35.45 |
| $2.5 \times 10^2$   | -     | -     | -     |
| $2.5 \times 10^1$   | -     | -     | -     |
| $2.5 \times 10^0$   | -     | -     | -     |

- Indicates detectable amplification was not observed for this replicate

---

**Supplementary Table 4.** PLS-DA modeling statistics for NA-SERS analysis of intact-cell *M. pneumoniae* dataset (a)

| Dilution by Genome equivalents (cells/ml) | PLS-DA Sensitivity After CV | PLS-DA Specificity After CV | PLS-DA Class Error After CV | PLS-DA RMSECV |
|-------------------------------------------|-----------------------------|-----------------------------|-----------------------------|---------------|
| [1] Mpn 7.3x10 <sup>8</sup>               | 0.9                         | 0.95                        | 0.075                       | 0.24          |
| [2] SP4 10 <sup>-2</sup>                  | 0.9                         | 0.95                        | 0.075                       | 0.27          |
| [3] Subs. bkg                             | 1                           | 0.97                        | 0.02                        | 0.14          |
| [1] Mpn 7.3x10 <sup>6</sup>               | 0.9                         | 1                           | 0.05                        | 0.25          |
| [2] SP4 10 <sup>-4</sup>                  | 0.9                         | 1                           | 0.05                        | 0.24          |
| [3] Subs. bkg                             | 1                           | 1                           | 0                           | 0.13          |
| [1] Mpn 7.3x10 <sup>5</sup>               | 1                           | 1                           | 0                           | 0.22          |
| [2] SP4 10 <sup>-5</sup>                  | 1                           | 1                           | 0                           | 0.16          |
| [3] Subs. bkg                             | 1                           | 1                           | 0                           | 0.21          |
| [1] Mpn 7.3x10 <sup>4</sup>               | 0.9                         | 0.9                         | 0.1                         | 0.32          |
| [2] SP4 10 <sup>-6</sup>                  | 1                           | 0.93                        | 0.03                        | 0.28          |
| [3] Subs. bkg                             | 1                           | 0.97                        | 0.02                        | 0.24          |
| [1] Mpn 7.3x10 <sup>3</sup>               | 0.95                        | 0.95                        | 0.05                        | 0.24          |
| [2] SP4 10 <sup>-7</sup>                  | 0.9                         | 0.9                         | 0.1                         | 0.29          |
| [3] Subs. Bkg                             | 1                           | 0.97                        | 0.02                        | 0.18          |
| [1] Mpn 7.3x10 <sup>2</sup>               | 0.95                        | 0.9                         | 0.075                       | 0.30          |
| [2] SP4 10 <sup>-8</sup>                  | 1                           | 0.97                        | 0.02                        | 0.26          |
| [3] Subs. bkg                             | 1                           | 1                           | 0                           | 0.23          |
| [1] Mpn 7.3x10 <sup>1</sup>               | 0.95                        | 1                           | 0.025                       | 0.23          |
| [2] SP4 10 <sup>-9</sup>                  | 0.7                         | 0.97                        | 0.17                        | 0.32          |
| [3] Subs. Bkg                             | 1                           | 0.93                        | 0.03                        | 0.26          |
| [1] Mpn 7.3x10 <sup>0</sup>               | 0.9                         | 0.89                        | 0.10                        | 0.35          |
| [2] SP4 10 <sup>-10</sup>                 | 0.56                        | 0.93                        | 0.25                        | 0.33          |
| [3] Subs. Bkg                             | 0.9                         | 1                           | 0.05                        | 0.17          |
| [1] Mpn 7.3x10 <sup>-1</sup>              | 0.95                        | 0.9                         | 0.075                       | 0.31          |
| [2] SP4 10 <sup>-11</sup>                 | 0.9                         | 0.97                        | 0.06                        | 0.34          |
| [3] Subs. bkg                             | 0.9                         | 0.86                        | 0.11                        | 0.31          |

Class [1]: Mpn = *M. pneumoniae* control and test dilution; Class [2]: SP4 = growth medium control dilution; Class [3]: Subs. bkg = nanorod substrate background; CV = cross-validation; RMSECV = root mean square error after cross-validation

**Supplementary Table 5.** PLS-DA modeling statistics for NA-SERS analysis of intact-cell *M. pneumoniae* dataset (b)

| Dilution by Genome equivalents (cells/ml) | PLS-DA Sensitivity After CV | PLS-DA Specificity After CV | PLS-DA Class Error After CV | PLS-DA RMSECV |
|-------------------------------------------|-----------------------------|-----------------------------|-----------------------------|---------------|
| [1] Mpn 5.4x10 <sup>10</sup>              | 0.9                         | 0.84                        | 0.13                        | 0.34          |
| [2] SP4 10 <sup>0</sup>                   | 0.67                        | 0.95                        | 0.19                        | 0.34          |
| [3] Subs. bkg                             | 1                           | 1                           | 0                           | 0.07          |
| [1] Mpn 5.4x10 <sup>8</sup>               | 1                           | 1                           | 0                           | 0.16          |
| [2] SP4 10 <sup>-2</sup>                  | 1                           | 1                           | 0                           | 0.10          |
| [3] Subs. bkg                             | 1                           | 1                           | 0                           | 0.11          |
| [1] Mpn 5.4x10 <sup>6</sup>               | 1                           | 0.95                        | 0.025                       | 0.23          |
| [2] SP4 10 <sup>-4</sup>                  | 0.9                         | 1                           | 0.05                        | 0.25          |
| [3] Subs. Bkg                             | 1                           | 1                           | 0                           | 0.11          |
| [1] Mpn 5.4x10 <sup>4</sup>               | 1                           | 0.9                         | 0.05                        | 0.20          |
| [2] SP4 10 <sup>-6</sup>                  | 0.9                         | 0.95                        | 0.075                       | 0.29          |
| [3] Subs. bkg                             | 1                           | 0.95                        | 0.025                       | 0.19          |
| [1] Mpn 5.4x10 <sup>3</sup>               | 1                           | 1                           | 0                           | 0.21          |
| [2] SP4 10 <sup>-7</sup>                  | 0.9                         | 0.95                        | 0.075                       | 0.26          |
| [3] Subs. Bkg                             | 1                           | 1                           | 0                           | 0.20          |
| [1] Mpn 5.4x10 <sup>2</sup>               | 0.9                         | 0.95                        | 0.075                       | 0.25          |
| [2] SP4 10 <sup>-8</sup>                  | 0.9                         | 0.95                        | 0.075                       | 0.27          |
| [3] Subs. Bkg                             | 1                           | 1                           | 0                           | 0.14          |
| [1] Mpn 5.4x10 <sup>1</sup>               | 0.7                         | 0.8                         | 0.25                        | 0.41          |
| [2] SP4 10 <sup>-9</sup>                  | 0.9                         | 0.9                         | 0.1                         | 0.31          |
| [3] Subs. Bkg                             | 1                           | 1                           | 0                           | 0.22          |
| [1] Mpn 5.4x10 <sup>0</sup>               | 0.7                         | 0.8                         | 0.25                        | 0.52          |
| [2] SP4 10 <sup>-10</sup>                 | 0.7                         | 0.85                        | 0.225                       | 0.49          |
| [3] Subs. Bkg                             | 1                           | 1                           | 0                           | 0.16          |
| [1] Mpn 5.4x10 <sup>-1</sup>              | 0.9                         | 0.86                        | 0.11                        | 0.27          |
| [2] SP4 10 <sup>-11</sup>                 | 0.9                         | 0.95                        | 0.075                       | 0.27          |
| [3] Subs. bkg                             | 1                           | 0.95                        | 0.025                       | 0.25          |

Class [1]: Mpn = *M. pneumoniae* control and test dilution; Class [2]: SP4 = growth medium control dilution; Class [3]: Subs. bkg = nanorod substrate background; CV = cross-validation; RMSECV = root mean square error after cross-validation



**Supplementary Table 6.** PLS-DA modeling for NA-SERS analysis of intact-cell *M. pneumoniae* dataset (c)

| Dilution by Genome equivalents (cells/ml) | PLS-DA Sensitivity After CV | PLS-DA Specificity After CV | PLS-DA Class Error After CV | PLS-DA RMSECV |
|-------------------------------------------|-----------------------------|-----------------------------|-----------------------------|---------------|
| [1] Mpn 7.1x10 <sup>9</sup>               | 0.9                         | 0.5                         | 0.25                        | 0.45          |
| [2] SP4 10 <sup>-1</sup>                  | 0.9                         | 0.6                         | 0.17                        | 0.44          |
| [3] Subs. Bkg                             | 1                           | 1                           | 0                           | 0.12          |
| [1] Mpn 7.1x10 <sup>7</sup>               | 0.9                         | 0.95                        | 0.075                       | 0.26          |
| [2] SP4 10 <sup>-3</sup>                  | 1                           | 0.95                        | 0.025                       | 0.25          |
| [3] Subs. Bkg                             | 1                           | 1                           | 0                           | 0.12          |
| [1] Mpn 7.1x10 <sup>5</sup>               | 1                           | 1                           | 0                           | 0.09          |
| [2] SP4 10 <sup>-5</sup>                  | 1                           | 1                           | 0                           | 0.11          |
| [3] Subs. Bkg                             | 1                           | 1                           | 0                           | 0.12          |
| [1] Mpn 7.1x10 <sup>4</sup>               | 1                           | 1                           | 0                           | 0.17          |
| [2] SP4 10 <sup>-6</sup>                  | 1                           | 1                           | 0                           | 0.15          |
| [3] Subs. bkg                             | 1                           | 1                           | 0                           | 0.18          |
| [1] Mpn 7.1x10 <sup>3</sup>               | 1                           | 0.95                        | 0.025                       | 0.18          |
| [2] SP4 10 <sup>-7</sup>                  | 1                           | 1                           | 0                           | 0.08          |
| [3] Subs. Bkg                             | 1                           | 1                           | 0                           | 0.16          |
| [1] Mpn 7.1x10 <sup>2</sup>               | 1                           | 0.95                        | 0.025                       | 0.24          |
| [2] SP4 10 <sup>-8</sup>                  | 0.9                         | 0.95                        | 0.075                       | 0.27          |
| [3] Subs. Bkg                             | 0.9                         | 1                           | 0.05                        | 0.25          |
| [1] Mpn 7.1x10 <sup>1</sup>               | 1                           | 0.95                        | 0.025                       | 0.27          |
| [2] SP4 10 <sup>-9</sup>                  | 1                           | 0.85                        | 0.075                       | 0.27          |
| [3] Subs. Bkg                             | 1                           | 1                           | 0                           | 0.20          |
| [1] Mpn 7.1x10 <sup>0</sup>               | 0.8                         | 0.9                         | 0.15                        | 0.24          |
| [2] SP4 10 <sup>-10</sup>                 | 1                           | 0.95                        | 0.025                       | 0.19          |
| [3] Subs. Bkg                             | 1                           | 0.95                        | 0.025                       | 0.14          |

Class [1]: Mpn = *M. pneumoniae* control and test dilution; Class [2]: SP4 = growth medium control dilution; Class [3]: Subs. bkg = nanorod substrate background; CV = cross-validation; RMSECV = root mean square error after cross-validation
